# Supplementary material for: Large Language Model−Based Chatbot vs Surgeon-Generated Informed Consent Documentation for Common Procedures
Source: PubMed Central journal article supplement (PMC10562939; doi:10.1001/jamanetworkopen.2023.36997), 2023-10-09
Supplement: jamanetwopen-e2336997-s001.pdf [file jamanetwopen-e2336997-s001.pdf]

## Data Sharing Statement

Decker. Large Language Model-Based Chatbot vs Surgeon-Generated Informed Consent Documentation for Common Procedures. *JAMA Netw Open*. Published October 09, 2023. doi:10.1001/jamanetworkopen.2023.36997

### Data

**Data available:** Yes

**Data types:** Deidentified participant data

**How to access data:** [Hannah.decker@ucsf.edu](mailto:Hannah.decker@ucsf.edu)

**When available:** With publication

### Supporting Documents

**Document types:** None

### Additional Information

**Who can access the data:** Researchers for whom a project has been approved.

**Types of analyses:** Approved research.

**Mechanisms of data availability:** After approval of a proposal.
